# Supplementary material
Source: PubMed Central journal article supplement (PMC3679411)
Supplement: 442_2012_2538_MOESM1_ESM.pdf [file 442_2012_2538_MOESM1_ESM.pdf]

## **SUPPLEMENTARY MATERIAL**

### **Walter's two-layer hypothesis revisited: back to the roots!**

David Ward • Kerstin Wiegand • Stephan Getzin

Oecologia, DOI 10.1007/s00442-012-2538-y

D. Ward  
School of Life Sciences, University of KwaZulu-Natal,  
P. Bag X01, Scottsville 3209, South Africa  
e-mail: ward@ukzn.ac.za

D. Ward, K. Wiegand, S. Getzin  
Ecosystem Modelling, University of Göttingen,  
Büsgenweg 4, 37077 Göttingen, Germany

S. Getzin  
Department of Ecological Modelling, Helmholtz Centre  
for Environmental Research-UFZ, Permoserstrasse 15,  
04318 Leipzig, Germany

**Electronic Supplement.** Evidence for and against Walter’s two-layer hypothesis. We used Sankaran’s 650 mm MAP to differentiate dry from moist savannas. We used keywords as indicated in the *Methods* to search for appropriate papers. MAP = Mean annual precipitation; W = water use (including measurements of soil or plant water potentials, soil water content or stable isotope ratios); NP = National Park; GR = Game Reserve. \* = claimed no support for the two-layer hypothesis but only tested overlap in the upper soil layer, yet provided ample evidence that the shrub *Larrea divaricata* had deeper roots than the grass *Stipa tenuis*

| Vegetation system    | Location           | MAP (mm) | Seasonality of rainfall | Depth of excavation (cm); W | Woody fine roots < 2mm recorded | Evidence for two-layer hypothesis | Reference                  |
|----------------------|--------------------|----------|-------------------------|-----------------------------|---------------------------------|-----------------------------------|----------------------------|
| <b>Temperate</b>     |                    |          |                         |                             |                                 |                                   |                            |
| 1) Tallgrass prairie | Iowa, USA          | 882      | summer/<br>winter       | 150, W                      | no                              | yes                               | Asbjornsen et al. 2008     |
| 2) Tallgrass prairie | Kansas, USA        | 835      | summer/<br>winter       | W                           | -                               | yes                               | Nippert and Knapp 2007     |
| 3) Moist savanna     | Texas, USA         | 680      | summer/<br>winter       | 120                         | no                              | yes                               | Brown and Archer 1990      |
| 4) Moist savanna     | Texas, USA         | 665      | summer/<br>winter       | 270, W                      | yes                             | yes                               | Ansley et al. 2007         |
| 5) Dry savanna       | Arizona, USA       | 602      | summer/<br>winter       | W                           | -                               | yes                               | Weltzin and McPherson 1997 |
| 6) Sandhills         | Nebraska, USA      | 573      | summer/<br>winter       | W                           | no                              | yes                               | Eggemeyer et al. 2008      |
| 7) Dry savanna       | N.-California, USA | 559      | winter                  | W                           | -                               | yes                               | Baldocchi et al.2004       |
| 8) Dry savanna       | Arizona, USA       | 347      | summer/<br>winter       | 60                          | no                              | yes                               | Cable 1969                 |

|                             |                              |      |                   |        |     |         |                        |
|-----------------------------|------------------------------|------|-------------------|--------|-----|---------|------------------------|
| 9) Dry steppe               | La Pampa,<br>Argentina       | 344  | spring/<br>autumn | W      | -   | partial | Peláez et al. 1994     |
| 10) Dry steppe              | Colorado,<br>USA             | 321  | summer            | 200    | no  | yes     | Lee and Lauenroth 1994 |
| 11) Dry steppe              | Colorado,<br>USA             | 321  | summer            | 180, W | -   | yes     | Dodd et al. 1998       |
| 12) Semi-desert             | Chihuahuan desert,<br>Mexico | 264  | summer            | 70     | no  | yes     | Montaña et al. 1995    |
| 13) Dry steppe              | Patagonia,<br>Argentina      | 236  | summer/<br>winter | 50, W  | yes | yes*    | Rodriguez et al. 2007  |
| 14) Semi-desert             | Utah,<br>USA                 | 215  | summer/<br>winter | W      | -   | yes     | Schwinning et al. 2002 |
| 15) Dry steppe              | Patagonia,<br>Argentina      | 170  | winter            | W      | -   | yes     | Sala et al. 1989       |
| 16) Dry steppe              | Patagonia,<br>Argentina      | 168  | winter            | 40, W  | no  | yes     | Soriano and Sala 1983  |
| 17) Semi-desert             | Utah,<br>USA                 | 150  | summer/<br>winter | W      | -   | yes     | Ehleringer et al.1991  |
| 18) Dry steppe              | Patagonia,<br>Argentina      | 137  | winter            | 60     | no  | yes     | Golluscio et al. 1998  |
| <b>Subtropical/tropical</b> |                              |      |                   |        |     |         |                        |
| 19) Moist savanna           | Lamto,<br>Ivory Coast        | 1200 | summer            | 200    | yes | no      | Le Roux et al. 1995    |
| 20) Moist savanna           | Lamto,<br>Ivory Coast        | 1200 | summer            | 120, W | yes | no      | Mordelet et al.1997    |
| 21) Moist savanna           | Queensland,<br>Australia     | 1103 | summer            | 100    | yes | partial | Zerihunet al. 2006     |
| 22) Moist savanna           | Mole GR,<br>Ghana            | 1000 | summer            | 70     | no  | partial | Lawson et al. 1968     |

|                   |                                    |              |        |                          |              |         |                        |
|-------------------|------------------------------------|--------------|--------|--------------------------|--------------|---------|------------------------|
| 23) Moist savanna | Highveld,<br>Zimbabwe              | 890          | summer | 185, W                   | no           | yes     | Strang 1969            |
| 24) Moist savanna | Diamaré plain,<br>Cameroon         | 800          | summer | 150                      | no           | partial | Seghieri 1995          |
| 25) Moist savanna | Nairobi NP,<br>Kenya               | 786/<br>1034 | summer | W                        | -            | yes     | Hesla et al. 1985      |
| 26) Moist savanna | Tsavo NP,<br>Kenya                 | 767          | summer | 120                      | not strictly | no      | Belsky 1994            |
| 27) Moist savanna | Darwin,<br>Australia               | 1708         | summer | 60, W                    | yes          | no      | February et al. 2012   |
| 28) Moist savanna | Kruger Park,<br>South Africa       | 746          | summer | W                        | no           | no      | Kulmatiski et al. 2010 |
| 29) Moist savanna | Kruger Park,<br>South Africa       | 740          | summer | 100, W                   | no           | no      | Verweij et al. 2011    |
| 30) Dry savanna   | Nylsvley,<br>South Africa          | 630          | summer | 120                      | no           | yes     | Knoop and Walker 1985  |
| 31) Dry savanna   | Tsavo NP,<br>Kenya                 | 450          | summer | 120                      | not strictly | yes     | Belsky 1994            |
| 32) Dry savanna   | Kalahari,<br>Botswana              | 365/<br>400  | summer | 120, W                   | no           | no      | Hipondokaet al. 2003   |
| 33) Dry savanna   | Barkly West,<br>South Africa       | 380          | summer | pot expt. to<br>60 cm, W | yes          | yes     | Kambatuku et al. 2012  |
| 34) Dry savanna   | Northern Province,<br>South Africa | 376          | summer | W                        | -            | yes     | Smit and Rethman 2000  |
| 35) Desert        | Springbok,<br>South Africa         | 131-<br>150  | winter | 50                       | yes          | yes     | Shiponeni et al. 2011  |
| 36) Desert        | Paulshoek,<br>South Africa         | 116          | winter | 60, W                    | no           | yes     | February et al. 2011   |
